# Supplementary material for: Preventive effects of sea cucumber-derived fucoidan on Helicobacter pylori -induced gastritis: a mechanistic investigation based on regulation of the gut microbiota and metabolic products
Source: Royal Society of Chemistry journal article supplement (doi:10.1039/d5fo04897d), 2025-12-30
Supplement: d5fo04897d1.pdf [file d5fo04897d1.pdf]

**Preventive Effects of Sea Cucumber-Derived Fucoidan on  
*Helicobacter pylori*-Induced Gastritis: Mechanistic Investigation  
Based on Regulation of Gut Microbiota and Metabolic Products**

Junhan Cao<sup>a,b,c</sup>, Kai Wang<sup>c</sup>, Mengke Yao<sup>c,d</sup>, Qing Zhang<sup>d</sup>, Kuan Lu<sup>f</sup>, Changfeng Qu<sup>d</sup>,  
Wancui Xie<sup>f</sup>, Hua Yin<sup>a\*</sup>, Xinpeng Wang<sup>b\*</sup>, Jinlai Miao<sup>c,d\*</sup>, Changhu Xue<sup>c</sup>

<sup>a</sup>R&D center, Tsingtao Brewery Co., LTD, Qingdao, 266207, China;

<sup>b</sup>School of Rehabilitation Sciences and Engineering, University of Health and Rehabilitation Sciences, Qingdao, 266113, China;

<sup>c</sup>College of Food Science and Engineering, Ocean University of China, Qingdao, 266003, China;

<sup>d</sup>Qingdao Key Laboratory of Marine Natural Products Research and Development Laboratory, First Institute of Oceanography, Ministry of Natural Resources, Qingdao, 266061, China;

<sup>e</sup>Qingdao Hospital, University of Health and Rehabilitation Sciences (Qingdao Municipal Hospital), Qingdao, 266071, China;

<sup>f</sup>Homey Group International Inc., Rongcheng, 264305, China.

**\*Corresponding authors:**

**Email:** [miaojinlai@fio.org.cn](mailto:miaojinlai@fio.org.cn)

## Supplementary Figures

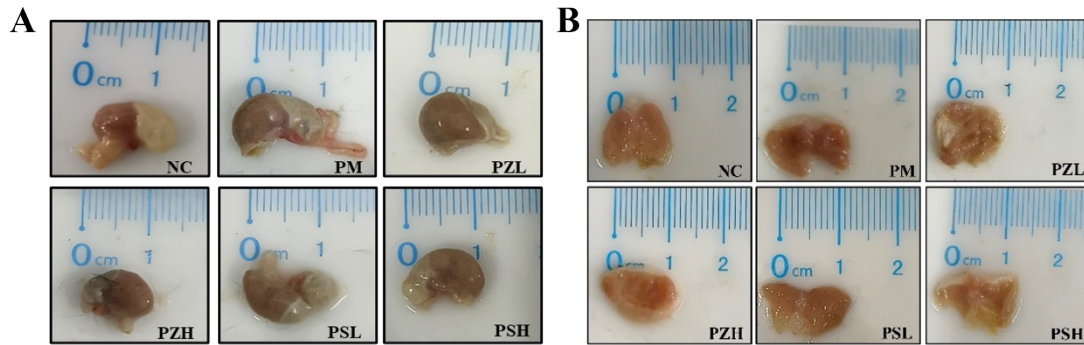

Supplementary Fig. 1 Macroscopic image (A) and anatomical diagram (B) of the gastric tissue.

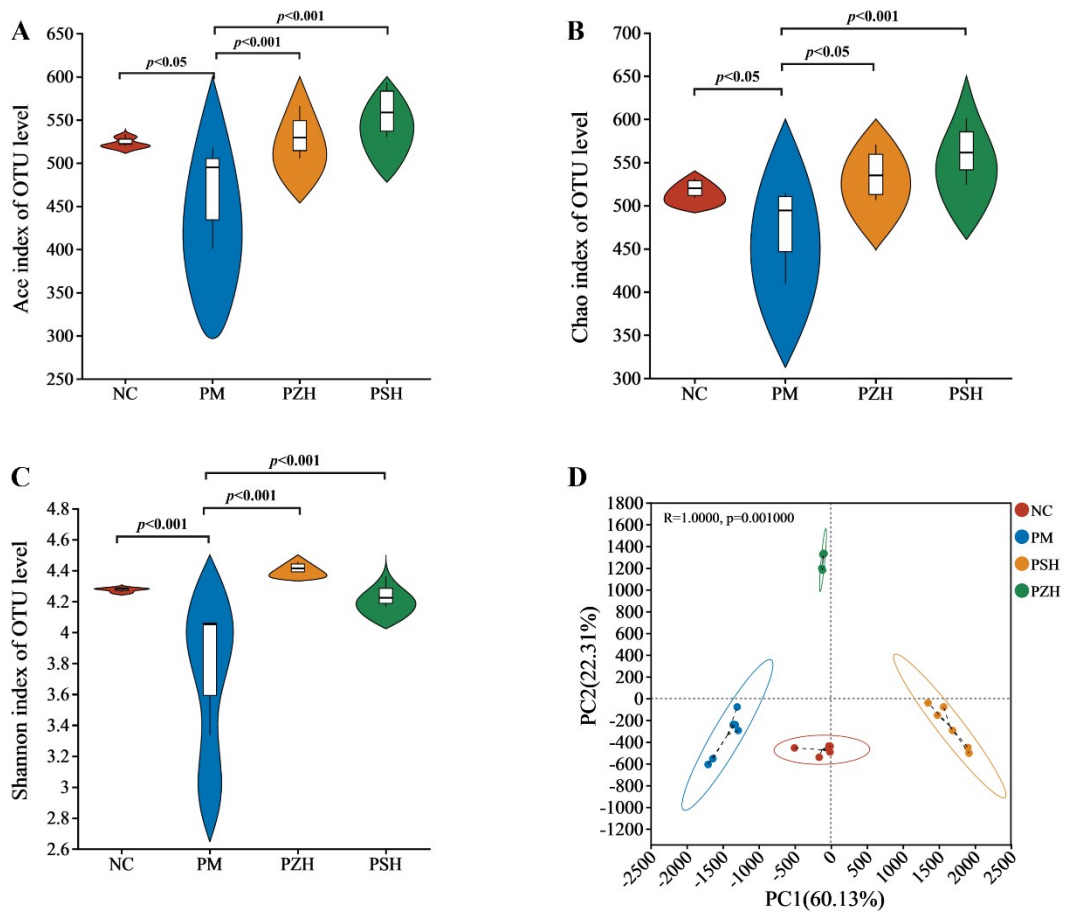

Supplementary Fig. 2 Analysis of diversity of gut microbiota. (A) Kruskal-Wallis H test for the Ace index; (B) Kruskal-Wallis H test for the Chao index; (C) Kruskal-Wallis H test for the Shannon index; (D) PCA analysis at the OTU level. Each group comprised

n = 6 biologically independent mice.  $p < 0.05$  indicates significant differences between groups.

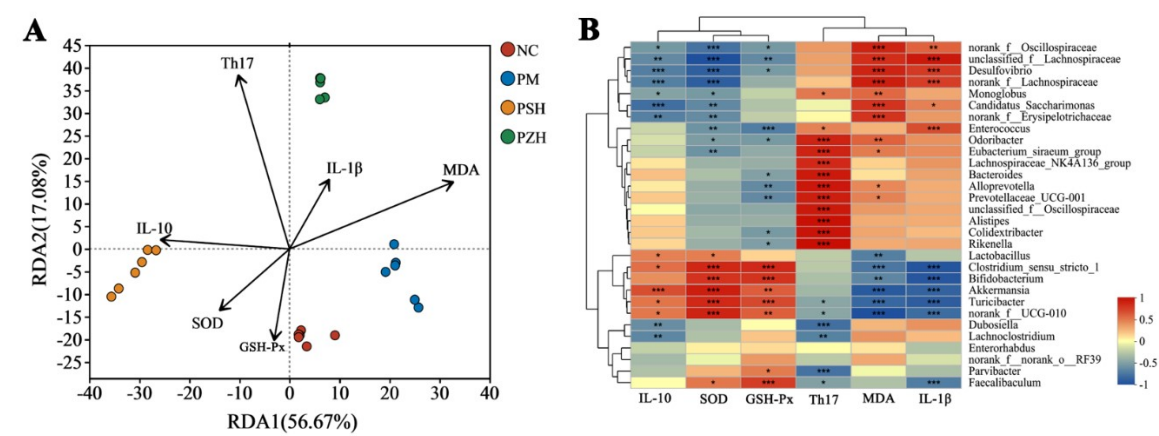

Supplementary Fig. 3 (A) RDA analysis of gut microbiota at the genus level; (B) Correlation analysis between inflammatory factors and gut microbiota.

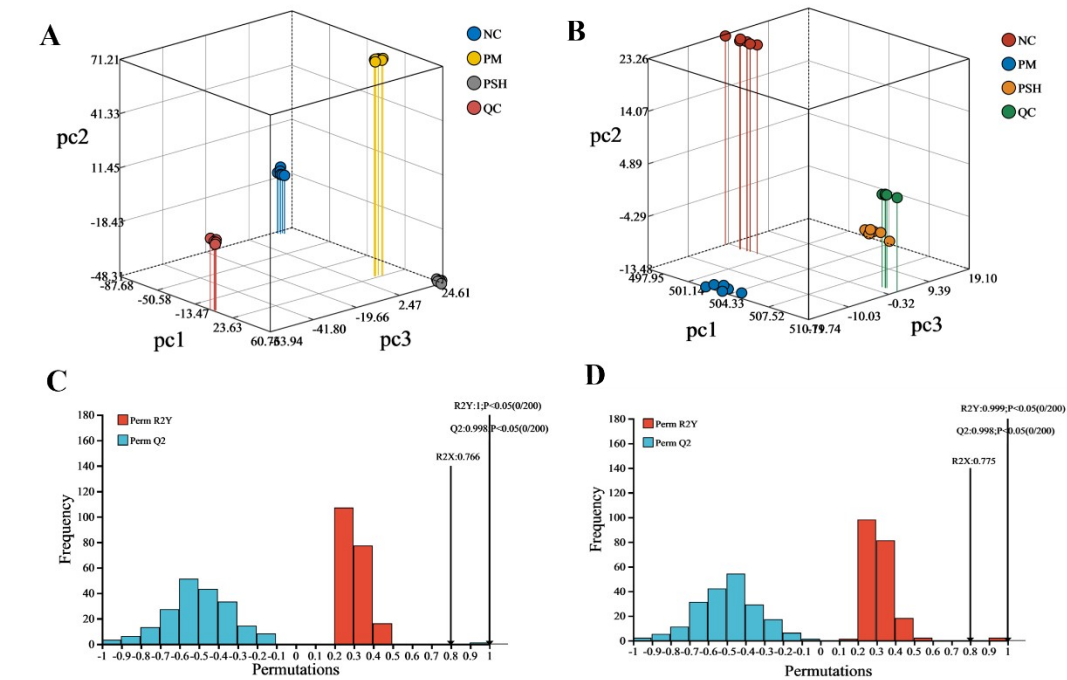

Supplementary Fig. 4 3D-PCA diagram of metabolites in the prevention group in positive (A) and negative (B) modes and PLS-DA replacement test in positive (C) and negative (D) modes.

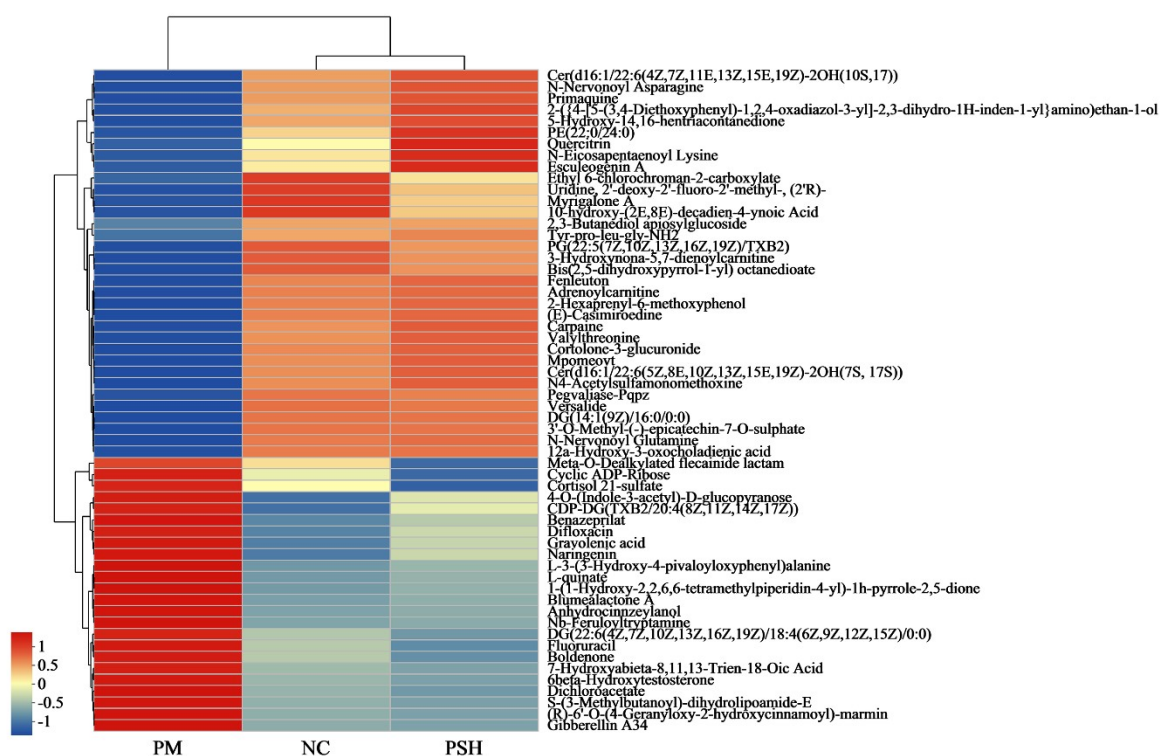

Supplementary Fig. 5 Cluster heatmap analysis of common differential metabolites of PM vs NC and PSH vs PM metabolic set.

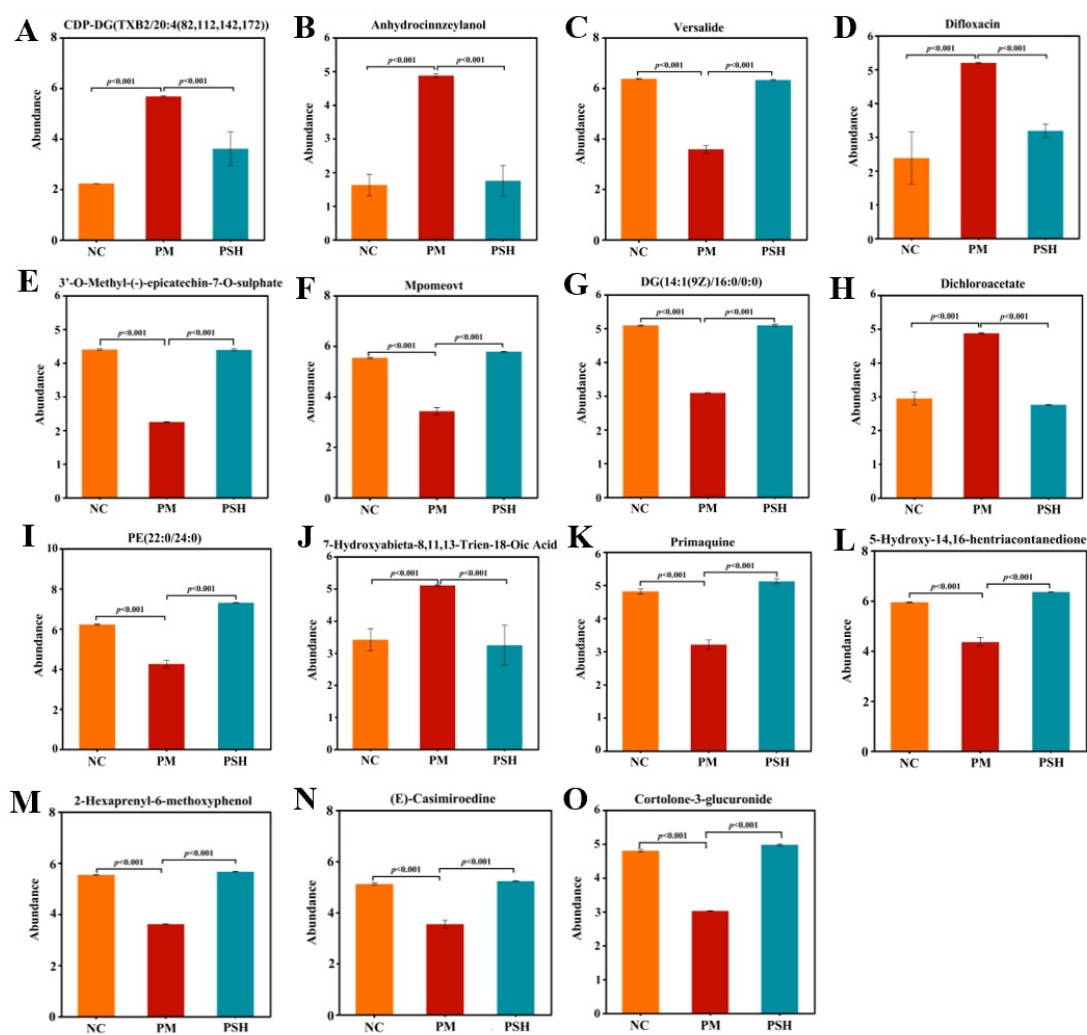

Supplementary Fig. 6 Key metabolites. (A) The relative content of CDP-DG (TXB2/20:4(8Z,11Z,14Z,17Z)); (B) The relative content of Anhydrocinnzeylanol; (C) The relative content of Versalide; (D) Tthe relative content of Difloxacin; (E) The relative content of 3'-O-methyl(-)-epicatechin-7-O-sulphate; (F) The relative content of Mpomeovt; (G) The relative content of DG (14:1(9Z)/16:0/0:0); (H) The relative content of Dichloroacetate; (I) The relative content of PE (22:0/24:0); (J) The relative content of 7-hydroxyabieta-8,11,13-rien-18-oic acid; (K) The relative content of Primaquine; (L) The relative content of 5-hydroxy-14,16-hentriacontanedione; (M) The relative content of 2-hexaprenyl-6-methoxyphenol; (N) The relative content of (E)-

casimiroedine; (O) The relative content of cortolone-3-glucuronide.  $p < 0.05$  indicates significant differences between groups.
