# Supplementary figures and images for: Preventive effects of sea cucumber-derived fucoidan on Helicobacter pylori -induced gastritis: a mechanistic investigation based on regulation of the gut microbiota and metabolic products
Source: Royal Society of Chemistry journal article supplement (doi:10.1039/d5fo04897d), 2025-12-30

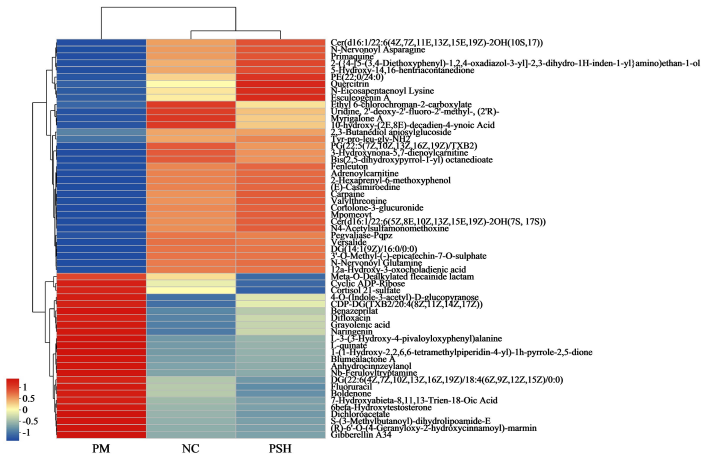

Supplement: d5fo04897d7.pdf [file d5fo04897d7.pdf]
